# Supplementary material for: Fabrication of a nitrogen-doped graphene quantum dot from MOF-derived porous carbon and its application for highly selective fluorescence detection of Fe3+
Source: Royal Society of Chemistry journal article supplement (doi:10.1039/c4tc01991a), 2014-11-03
Supplement: c4tc01991a1.pdf [file c4tc01991a1.pdf]

## Supporting information:

### **Fabrication of Nitrogen-Doped Graphene Quantum Dot from MOFs-Derived Porous Carbon and its Application for Highly Selective Fluorescent Detection of Fe<sup>3+</sup>**

Hongbo Xu,<sup>ab</sup> Shenghai Zhou,<sup>a</sup> Lili Xiao,<sup>ab</sup> Huanhuan Wang,<sup>a</sup> Shouzhu Li,<sup>a</sup> and Qunhui Yuan<sup>\*a</sup>

<sup>a</sup>Laboratory of Environmental Sciences and Technology, Xinjiang Technical Institute of Physics and Chemistry; Key Laboratory of Functional Materials and Devices for Special Environments, Chinese Academy of Sciences, 40-1 Beijing Road, Urumqi, Xinjiang, 830011, China

<sup>b</sup>University of Chinese Academy of Sciences, No.19A Yuquan Road, Beijing, 100049, China

\*Author to whom correspondence should be addressed.

Tel: +86-(0)991-3677875; Fax: +86-(0)991-3838957

E-mail: yuanqh@ms.xjb.ac.cn

**Table S1.** Determination of Fe<sup>3+</sup> concentration in tap water samples. (n=3)

|          | Detected<br>( $\mu\text{M}$ ) | Added<br>( $\mu\text{M}$ ) | Detected<br>( $\mu\text{M}$ ) | Recovery<br>(%) | RSD<br>(%) |
|----------|-------------------------------|----------------------------|-------------------------------|-----------------|------------|
| Sample 1 | 0                             | 10                         | $10.1 \pm 0.8$                | 101.0           | 7.7        |
| Sample 2 | 0                             | 30                         | $31.7 \pm 1.1$                | 105.7           | 3.3        |
| Sample 3 | 0                             | 50                         | $49.3 \pm 3.6$                | 98.6            | 7.3        |

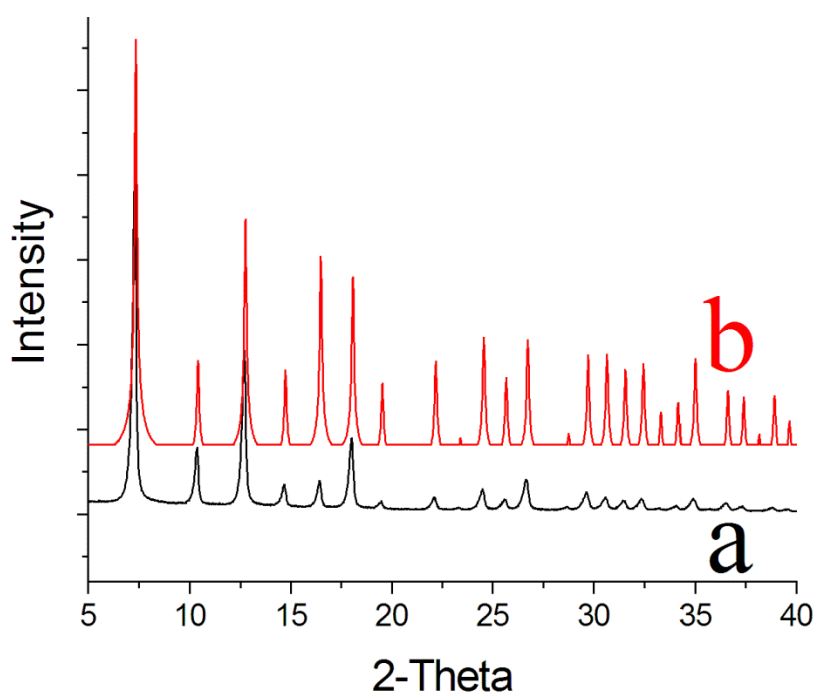

**Figure S1.** (a) XRD pattern of as-synthesized ZIF-8 nanocrystals. (b) Simulated XRD pattern from the published crystal structure data.<sup>[1]</sup>

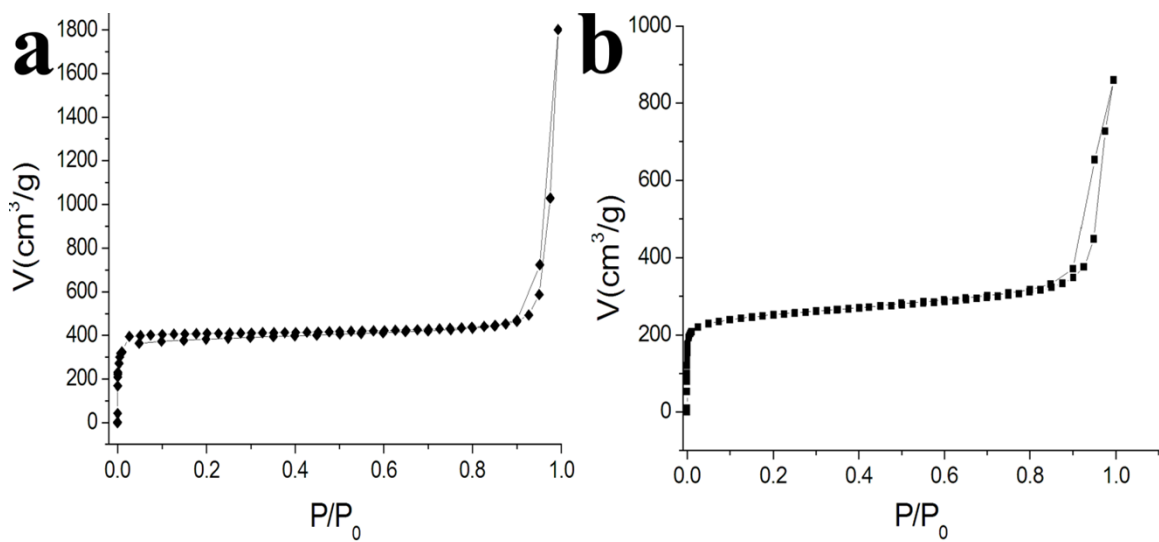

**Figure S2.**  $\text{N}_2$  adsorption-desorption isotherms of (a) ZIF-8 and (b) ZIF-8C.

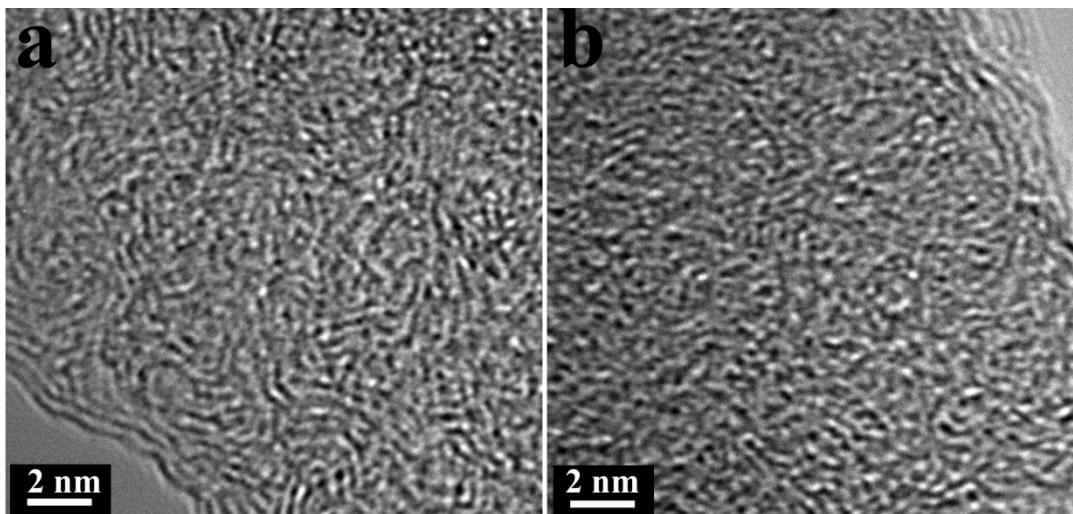

**Figure S3.** High-resolution TEM images representing the porous structures of (a) ZIF-8 and (b) ZIF-8C.

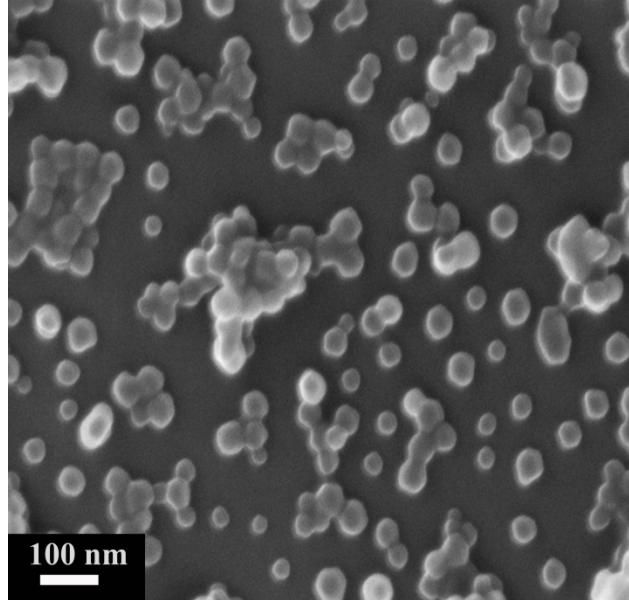

**Figure S4.** SEM image of the sphere-like ZIF-8C powder obtained after the acid vapor cutting.

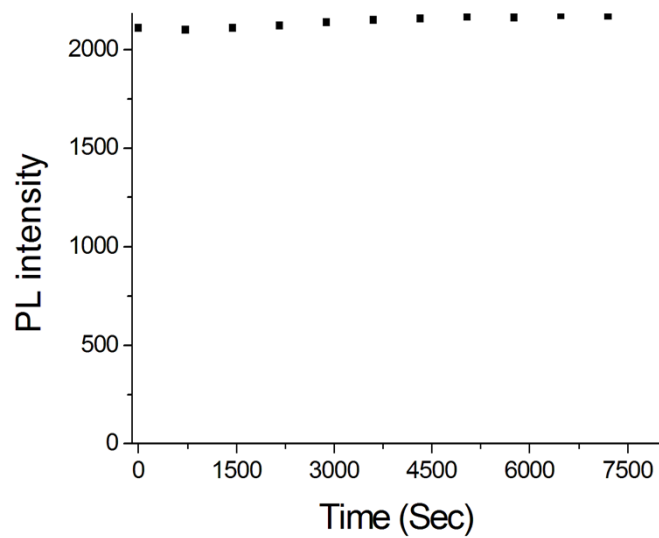

**Figure S5.** Time-dependent photoluminescence spectrum of a N-GQDs solution under 330 nm excitation at 25°C (Xe lamp, 150W).

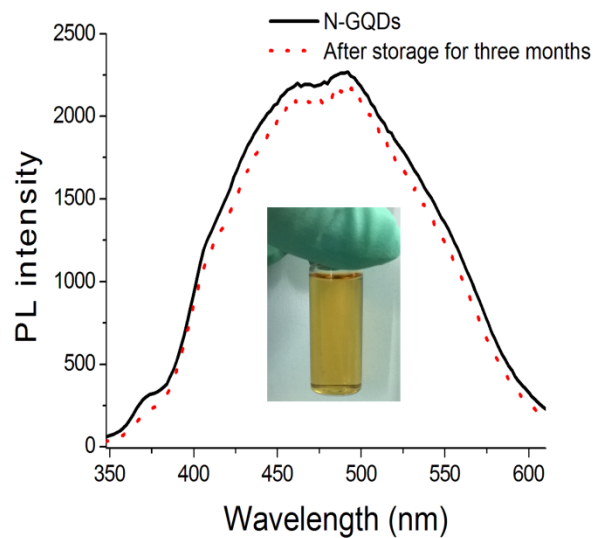

**Figure S6.** PL emission spectra of the freshly prepared N-GQDs (solid line) and the N-GQDs after storage for three months (dotted line). Inset: A photograph of the N-GQDs solution stored for three months.

## Reference

- [1] K. S. Park, Z. Ni, A.P. Côté, J. Y. Choi, R. Huang, F. J. Uribe-Romo, H.K. Chae, M. O’Keeffe, O.M. Yaghi, *Proc. Natl. Acad. Sci. USA.*, 2006, **103**,10186.
